# Supplementary material for: First principles calculations study of α-MnO2as a potential cathode for Al-ion battery application
Source: Royal Society of Chemistry journal article supplement (doi:10.1039/c9ta09321d), 2019-01-01
Supplement: c9ta09321d1.pdf [file c9ta09321d1.pdf]

Supplementary Information

**First Principle Calculations Study of  $\alpha$ -MnO<sub>2</sub> as a Potential Cathode for Al-Ion Battery Application**

Muhammad Hilmy Alfaruqi,<sup>ab</sup> Saiful Islam,<sup>a</sup> Jun Lee,<sup>a</sup> Jeonggeun Jo,<sup>a</sup> Vinod Mathew,<sup>a</sup> Jaekook Kim<sup>a\*</sup>

<sup>a</sup>Department of Materials Science and Engineering, Chonnam National University, 300 Yongbong-dong, Buk-gu, Gwangju 61186, Republic of Korea

<sup>b</sup>Departemen Teknik Metalurgi, Universitas Teknologi Sumbawa, Jl. Raya Olat Maras, Sumbawa, Nusa Tenggara Barat 84371, Indonesia

\* Corresponding author. Tel: +82-62-530-1703. Fax: +82-62-530-1699.  
E-mail: jaekook@chonnam.ac.kr (Jaekook Kim)

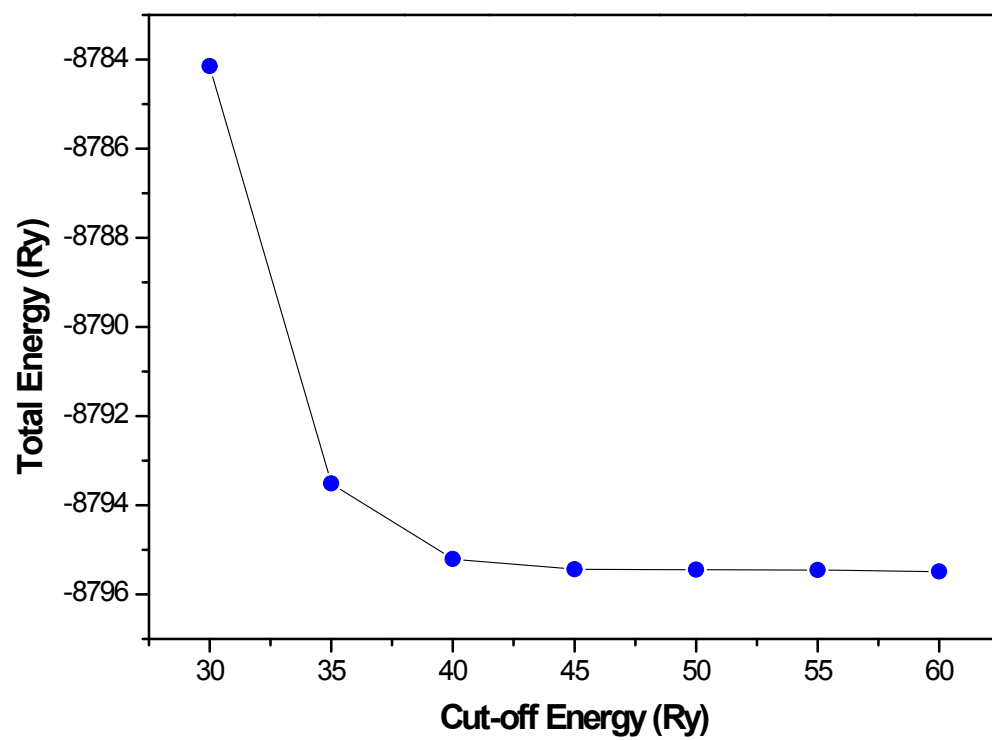

**Fig. S1** Convergence test results for determination of the cut-off energy.<sup>S1-S3</sup>

**Table S1** Lattice parameters of  $\alpha$ -MnO<sub>2</sub> calculated with and without  $U$  values and from JCPDS.

| $U$               | $a$ (Å)  | $c$ (Å)  |
|-------------------|----------|----------|
| Without $U$       | 9.729144 | 2.843746 |
| 1                 | 9.737103 | 2.854406 |
| 1.6               | 9.744911 | 2.861916 |
| 3                 | 9.769505 | 2.881524 |
| 3.3               | 9.776334 | 2.886177 |
| 3.6               | 9.784281 | 2.891126 |
| 3.9               | 9.79276  | 2.896217 |
| 4                 | 9.795763 | 2.897954 |
| 5                 | 9.833247 | 2.916991 |
| JCPDS No. 44-0141 | 9.7847   | 2.863    |

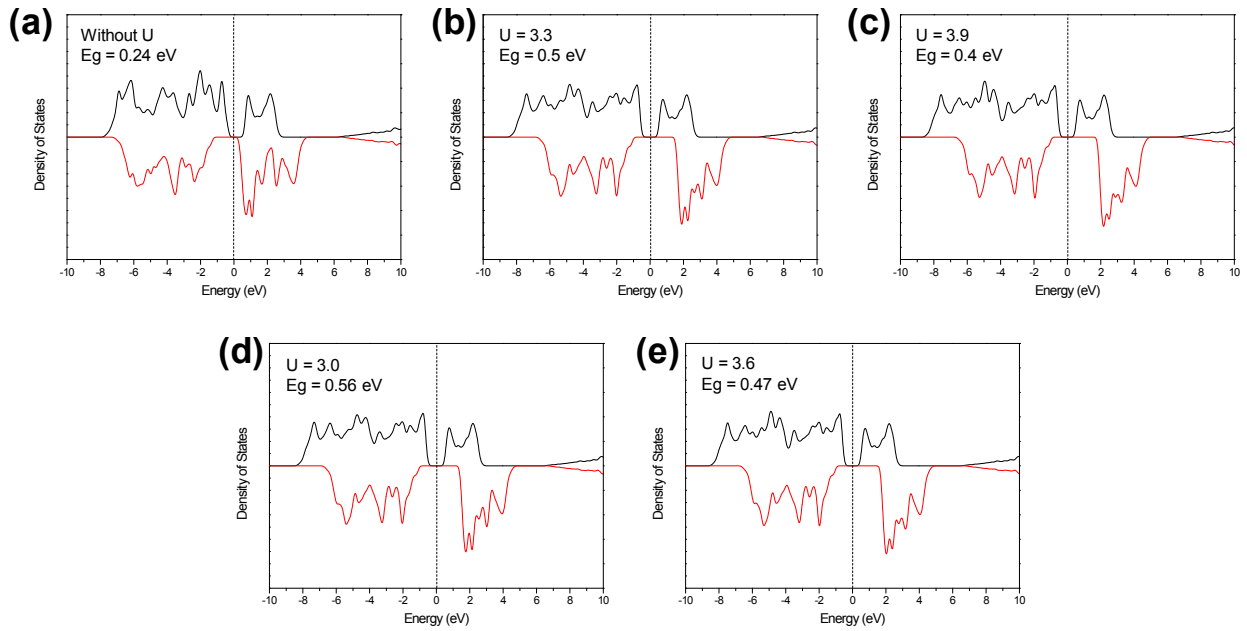

**Fig. S2** Total density of state  $\alpha$ -MnO<sub>2</sub> obtained using with and without  $U$  values.

**Table S2** Al insertion energies in the dilute concentration limit of  $\alpha$ -Al<sub>0.04</sub>MnO<sub>2</sub>

| <b>Site</b> | <b>E (eV)</b> |
|-------------|---------------|
| <i>2a</i>   | -2.03         |
| <i>2b</i>   | -0.66         |
| <i>4c</i>   | -4.03         |
| <i>8h</i>   | -5.43         |

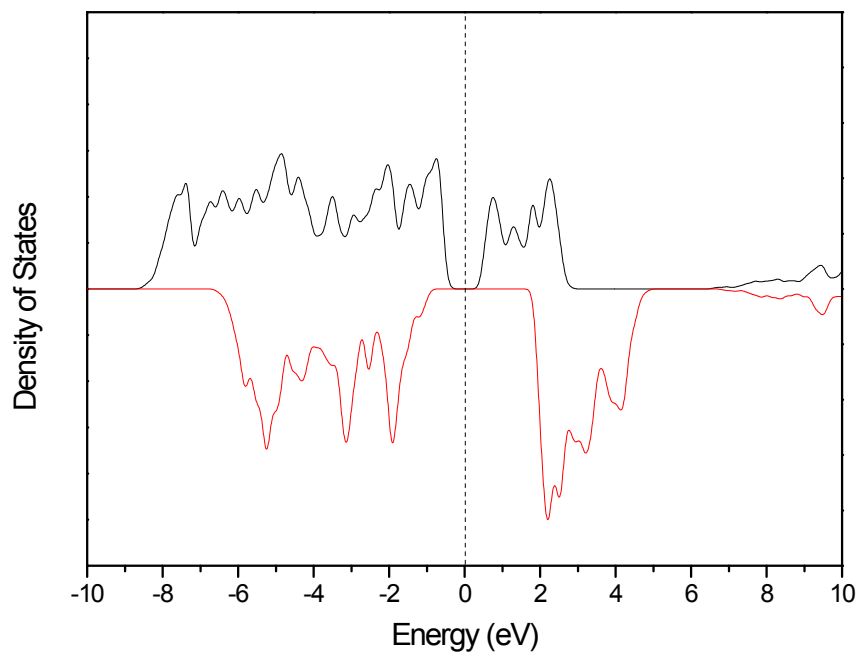

**Fig. S3** Density of states plot of  $\alpha$ -MnO<sub>2</sub> phase using PBEsol functional with k-points of  $6 \times 6 \times 6$ .

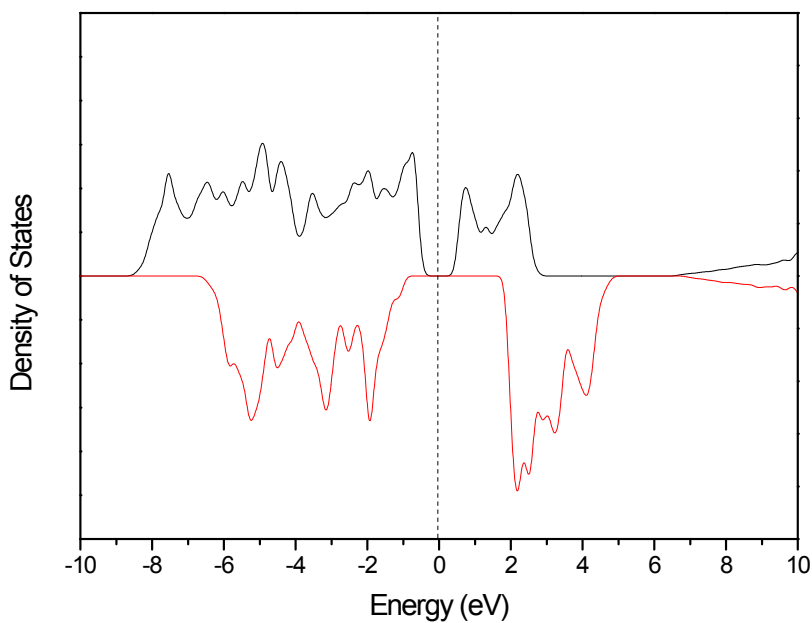

**Fig. S4** Density of states plot of  $\alpha$ -MnO<sub>2</sub> phase using PBEsol functional with k-points of  $20 \times 20 \times 20$ .

**Table S3** Bader charge analysis results.

| <b>Atom</b> | <b><math>\Delta</math> Charge</b> | <b>Atom</b> | <b><math>\Delta</math> Charge</b> | <b>Atom</b> | <b><math>\Delta</math> Charge</b> |
|-------------|-----------------------------------|-------------|-----------------------------------|-------------|-----------------------------------|
| Mn1         | 0.002441                          | O1          | 0.004545                          | O25         | 0.005473                          |
| Mn2         | 0.005624                          | O2          | 0.006329                          | O26         | 0.003704                          |
| Mn3         | 0.005739                          | O3          | 0.02135                           | O27         | 0.003278                          |
| Mn4         | 0.001708                          | O4          | 0.00336                           | O28         | 0.001801                          |
| Mn5         | 0.009707                          | O5          | 0.023711                          | O29         | -0.00089                          |
| Mn6         | 0.006249                          | O6          | 0.019432                          | O30         | 0.001023                          |
| Mn7         | 0.001889                          | O7          | 0.009143                          | O31         | 0.001609                          |
| Mn8         | 0.051787                          | O8          | 0.056623                          | O32         | -0.01583                          |
| Mn9         | 0.002556                          | O9          | 0.035879                          | O33         | 0.004583                          |
| Mn10        | 0.005714                          | O10         | 0.007104                          | O34         | 0.006402                          |
| Mn11        | 0.005827                          | O11         | 0.056004                          | O35         | 0.021388                          |
| Mn12        | 0.001844                          | O12         | 0.006272                          | O36         | 0.003415                          |
| Mn13        | 0.000692                          | O13         | -0.00074                          | O37         | 0.10782                           |
| Mn14        | -0.00083                          | O14         | 0.001179                          | O38         | 0.078464                          |
| Mn15        | 4.9E-05                           | O15         | 0.001707                          | O39         | 0.026509                          |
| Mn16        | 0.006452                          | O16         | -0.01593                          | O40         | 1.023389                          |
| Mn17        | 0.0193                            | O17         | 0.000891                          | O41         | 0.035935                          |
| Mn18        | 0.005329                          | O18         | 0.006259                          | O42         | 0.007073                          |
| Mn19        | 0.083862                          | O19         | -0.0004                           | O43         | 0.056061                          |
| Mn20        | 0.003217                          | O20         | 0.001863                          | O44         | 0.006257                          |
| Mn21        | 0.009836                          | O21         | 0.023716                          | O45         | 0.002687                          |
| Mn22        | 0.006327                          | O22         | 0.019353                          | O46         | -0.00172                          |
| Mn23        | 0.002055                          | O23         | 0.009233                          | O47         | 0.002102                          |
| Mn24        | 0.052191                          | O24         | 0.056766                          | O48         | 0.00743                           |

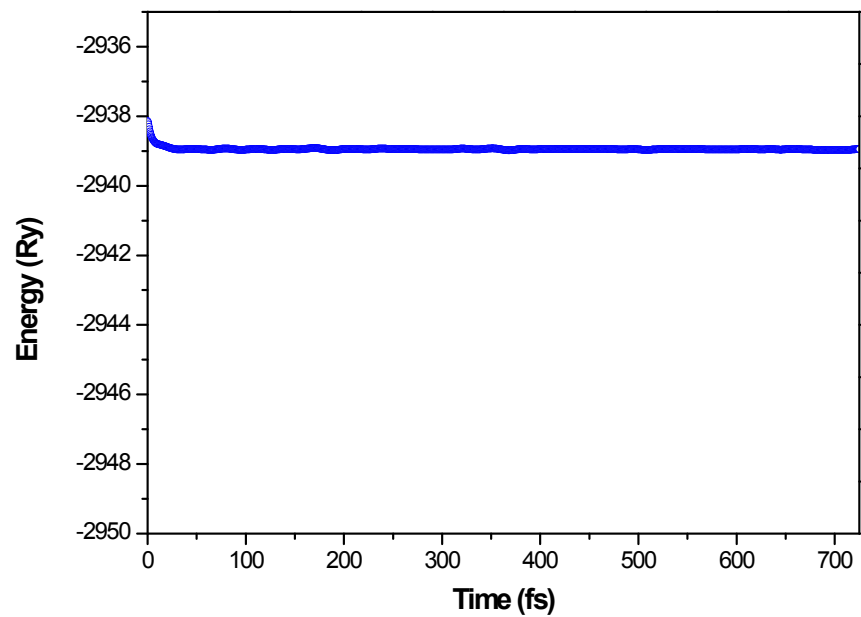

**Fig. S5** Total energy variation as a function of time in the AIMD simulation at 300 K.

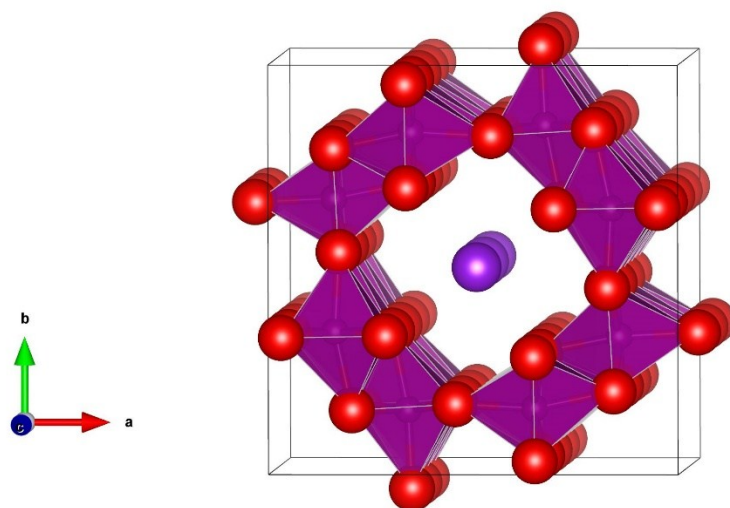

**Fig. S6** Relaxed structure of K-doped  $\alpha$ -MnO<sub>2</sub> phase.

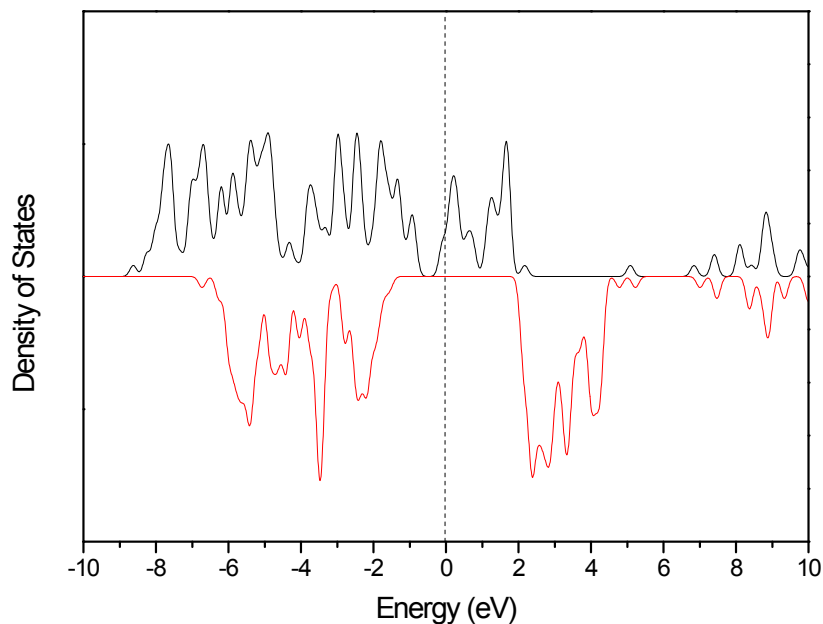

**Fig. S7** Total density of states of K-doped  $\alpha$ -MnO<sub>2</sub> phase.

### ESI Note I

We have performed test calculations for the Hubbard ( $U$ ) parameter for Mn. Initially, we performed structural relaxation for  $\alpha$ -MnO<sub>2</sub> using  $U = 1, 1.6, 3, 3.3, 3.6, 3.9, 4, 5$  eV and without applying  $U$ . Some of the  $U$  values were selected based on previous reports.<sup>S4-S7</sup> The obtained lattice parameters for  $U = 3.9$  eV, which was used in our calculation and is commonly used for the DFT studies of electrode materials, are reasonable and close to the standard JCPDS No. 44-0141. Furthermore, we also performed density of states (DoS) calculation for  $U = 3, 3.3, 3.6, 3.9$  eV and without  $U$ . It can be seen that DoS results without applying  $U$ , the spin-down in the conduction band is located near the Fermi level, while after applying  $U$ , the spin-down in the conduction band moves further away from the Fermi level. We can observe also as the  $U$  values increase, the band gaps decrease.



## References

- S1. C. Feigl, S.P. Russo, A.S. Barnard, *Mol. Simulat.*, **2011**, 37, 321.
- S2. B.S. Youmbi, S. Zékeng, S. Domngang, F. Calvayrac, A. Bulou, *Ionics*, **2012**, 18, 371.
- S3. N. Pantha, K. Belbase, N.P. Adhikari, *Appl. Nanosci.*, **2015**, 5, 393.
- S4. Z. Yang, X. Wang, Y. Huang, *Curr. Appl. Phys.*, **2015**, 15, 1556.
- S5. Y. Crespo, N. Seriani, *Phys. Rev. B*, **2013**, 88, 144428.
- S6. H. Ji, A. Urban, D.A. Kitchaev, D.-H. Kwon, N. Artrith, C. Ophus, W. Huang, Z. Cai, T. Shi, J.C. Kim, H. Kim, G. Ceder, *Nat. Commun.*, **2019**, 10, 592.
- S7. D. Wang, L.-M. Liu, S.-J. Zhao, B.-H. Li, H. liu, X.-F. Lang, *Phys. Chem. Chem. Phys.*, **2013**, 15, 9075.
